# Supplementary material for: Patterns and management of chronic obstructive pulmonary disease in urban and rural China: a community-based survey of 25 000 adults across 10 regions
Source: PubMed Central journal article supplement (PMC5844384; doi:10.1136/bmjresp-2017-000267), 2018-02-19
Supplement: bmjresp-2017-000267supp001.pdf [file bmjresp-2017-000267supp001.pdf]

## **Supplementary data**

### **Patterns and management of chronic obstructive pulmonary disease in urban and rural China: a community-based survey of 25,000 adults across 10 regions**

Om P Kurmi PhD, Kourtney Davis PhD, Kin Bong Hubert Lam PhD, Yu Guo MSc,  
Julien Vaucher MD, Derrick Bennett PhD, Jenny Wang MSc, Zheng Bian MD,  
Huaidong Du PhD, Liming Li PhD, Robert Clarke FRCP, Zhengming Chen DPhil for  
the China Kadoorie Biobank Collaborative Group (members listed at the end of paper)

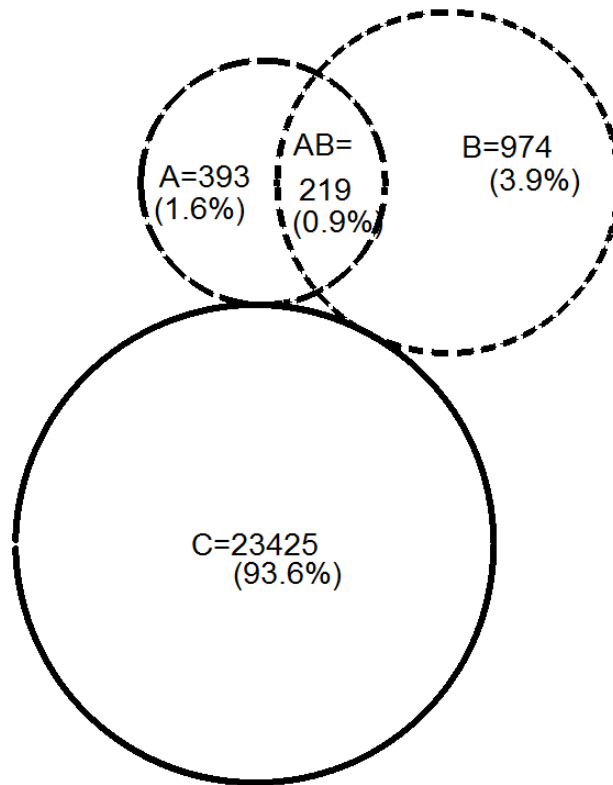

**Fig. S1** Venn diagram showing the repartition of participants in the study population.  
A= Symptom-based COPD only; B= Doctor-diagnosed COPD only; AB= Symptom-based COPD and Doctor-diagnosed COPD; C=Absence of COPD

**Table S1** Prevalence of co-morbidities (self-reported but doctor diagnosed) amongst COPD cases

| Characteristics             | Study population | Symptom-based COPD <sup>a</sup><br>% (95% CI) | Doctor-diagnosed COPD <sup>b</sup><br>% (95% CI) | Symptom-based or doctor-diagnosed COPD <sup>c</sup><br>% (95% CI) |
|-----------------------------|------------------|-----------------------------------------------|--------------------------------------------------|-------------------------------------------------------------------|
| <b>All participants (%)</b> | 25011            | 612 (2.4)                                     | 1193 (4.8)                                       | 1586 (6.3)                                                        |
| <b>Co-morbidities</b>       |                  |                                               |                                                  |                                                                   |
| Asthma                      | 265              | 15.7 (14.1, 17.2)                             | 40.9 (38.8, 42.9)                                | 45.7 (43.6, 47.8)                                                 |
| Stroke                      | 853              | 3.1 (2.6, 3.6)                                | 5.5 (4.8, 6.2)                                   | 7.6 (6.8, 8.4)                                                    |
| IHD                         | 1476             | 4.0 (3.6, 4.5)                                | 8.7 (8.1, 9.3)                                   | 10.4 (9.7, 11.1)                                                  |
| Hypertension                | 6330             | 2.7 (2.6, 2.9)                                | 5.4 (5.1, 5.6)                                   | 7.2 (6.9, 7.4)                                                    |
| Lung cancer                 | 21               | 2.9 (0.5, 5.3)                                | 6.3 (2.6, 9.9)                                   | 9.2 (4.9, 13.5)                                                   |
| Rheumatoid arthritis        | 1167             | 4.5 (4.0, 4.9)                                | 8.7 (8.1, 9.3)                                   | 11.2 (10.5, 11.9)                                                 |
| Tuberculosis                | 317              | 5.3 (4.3, 6.3)                                | 12.7 (11.3, 14.2)                                | 14.0 (12.6, 15.5)                                                 |
| Diabetes                    | 1847             | 2.4 (2.1, 2.8)                                | 4.2 (3.8, 4.6)                                   | 5.9 (5.5, 6.3)                                                    |

<sup>a</sup>Symptom-based COPD are those with self-reported chronic cough i.e. productive cough for at least 3 months for 2 consecutive years; <sup>b</sup>COPD defined by history of doctor diagnosis of COPD where COPD= COPD and/or Chronic bronchitis and/or emphysema; <sup>c</sup>Either <sup>a</sup> or <sup>b</sup>; Standardised for region, age group and gender as appropriate

**Table S2** Functional status impact and management of COPD by region

| <b>Characteristics</b>                                        | <b>Total<sup>a</sup></b> | <b>Rural<sup>b</sup></b> | <b>Urban<sup>b</sup></b> |
|---------------------------------------------------------------|--------------------------|--------------------------|--------------------------|
| <b>Participants</b>                                           | 1586                     | 911                      | 675                      |
| <b>CAT-score</b>                                              |                          |                          |                          |
| <10                                                           | 882 (56.0)               | 499 (54.8)               | 383 (56.9)               |
| 10–20                                                         | 514 (33.0)               | 305 (33.5)               | 209 (30.9)               |
| >20                                                           | 190 (11.0)               | 107 (11.8)               | 83 (12.2)                |
| <b>Understanding of condition and treatment</b>               |                          |                          |                          |
| Well informed                                                 | 295 (17.8)               | 115 (12.6)               | 180 (26.7)               |
| Inadequately/poorly informed                                  | 1114 (71.3)              | 686 (75.4)               | 428 (63.4)               |
| Don't know                                                    | 177 (10.9)               | 110 (12.0)               | 67 (9.9)                 |
| <b>Self-reported severity of chronic lung disease</b>         |                          |                          |                          |
| Severe/Very severe                                            | 295 (18.7)               | 192 (21.1)               | 103 (15.2)               |
| Moderate                                                      | 578 (36.5)               | 319 (35.1)               | 259 (38.4)               |
| Mild/very mild                                                | 713 (44.8)               | 400 (43.9)               | 313 (46.4)               |
| <b>Health care professional consultations(last 12 months)</b> |                          |                          |                          |
| No                                                            | 721 (46.8)               | 459 (50.3)               | 262 (38.8)               |
| Yes                                                           | 865 (53.2)               | 452 (49.7)               | 413 (61.2)               |
| General physician                                             | 536 (32.7)               | 294 (32.3)               | 242 (35.8)               |
| Respiratory specialist                                        | 305 (19.1)               | 141 (15.5)               | 164 (24.4)               |
| Cardiologist/heart specialist                                 | 74 (4.5)                 | 37 (4.1)                 | 37 (5.5)                 |
| Traditional Chinese medicine doctor                           | 132 (7.7)                | 73 (8.0)                 | 59 (8.7)                 |
| Other medical professional                                    | 104 (6.2)                | 59 (6.5)                 | 45 (6.6)                 |
| <b>Hospitalisation for COPD (last 12 months)</b>              |                          |                          |                          |
| None                                                          | 1333 (84.6)              | 765 (84.7)               | 568 (84.7)               |
| One                                                           | 182 (12.0)               | 107 (11.9)               | 75 (11.2)                |
| ≥ Two                                                         | 58 (3.4)                 | 31 (3.4)                 | 27 (4.1)                 |
| <b>Oxygen therapy at home (last 12 months)</b>                |                          |                          |                          |
| No                                                            | 1523 (96.7)              | 881 (98.0)               | 642 (96.1)               |
| Yes                                                           | 44 (3.3)                 | 18 (2.0)                 | 26 (3.9)                 |
| <b>Vaccination (last 12 months)</b>                           |                          |                          |                          |
| No                                                            | 1527 (96.5)              | 875 (96.1)               | 652 (96.6)               |
| Yes                                                           | 59 (3.5)                 | 36 (3.9)                 | 23 (3.4)                 |
| Influenza vaccination                                         | 54 (2.9)                 | 33 (3.6)                 | 21 (3.1)                 |
| Pneumococcal vaccination                                      | 14 (1.0)                 | 6 (0.7)                  | 8 (1.2)                  |
| <b>Medication for COPD exacerbation (last 12 months)</b>      |                          |                          |                          |
| No                                                            | 1072 (68.2)              | 632 (69.4)               | 440 (65.2)               |
| Yes                                                           | 514 (31.8)               | 279 (30.6)               | 235 (34.8)               |
| Antibiotics                                                   | 483 (30.2)               | 264 (29.0)               | 219 (32.4)               |
| Oral steroids                                                 | 107 (6.5)                | 58 (6.4)                 | 49 (7.2)                 |
| Injectable steroids                                           | 70 (4.6)                 | 30 (3.3)                 | 40 (5.9)                 |
| Number of COPD exacerbations after medication                 |                          |                          |                          |
| None                                                          | 1185 (74.6)              | 723 (79.4)               | 462 (68.5)               |
| One                                                           | 202 (12.9)               | 80 (8.8)                 | 122 (18.0)               |
| ≥ Two                                                         | 199 (12.6)               | 108 (11.8)               | 91 (13.4)                |
| <b>Prescribed medication (last 7 days)</b>                    |                          |                          |                          |
| No                                                            | 1447 (89.4)              | 840 (92.2)               | 607 (89.9)               |
| Yes                                                           | 139 (10.6)               | 71 (7.8)                 | 68 (10.1)                |
| Short-acting bronchodilators                                  | 25 (2.0)                 | 12 (1.3)                 | 13 (1.9)                 |
| Long-acting bronchodilators                                   | 16 (1.2)                 | 6 (0.7)                  | 10 (1.5)                 |
| Oral bronchodilators                                          | 19 (1.1)                 | 8 (0.9)                  | 11 (1.6)                 |
| Traditional Chinese medicine                                  | 33 (2.5)                 | 18 (2.0)                 | 15 (2.2)                 |
| Other treatments                                              | 94 (7.2)                 | 50 (5.5)                 | 44 (6.6)                 |

<sup>a</sup>Standardised for region, age group and gender; <sup>b</sup> Standardised for age group and gender. Short acting bronchodilators (short-acting beta2-agonist/short-acting muscarinic antagonist); Long-acting bronchodilators (long-acting beta2-agonist / long-acting muscarinic antagonist)

**Table S3** Disease severity and management by different COPD criteria by smoking status

| Characteristics                                               | Total       | Never-regular | Ever-regular |
|---------------------------------------------------------------|-------------|---------------|--------------|
| <b>Participants</b>                                           | 1586        | 984           | 602          |
| <b>CAT-score</b>                                              |             |               |              |
| <10                                                           | 882 (56.0)  | 539 (55.7)    | 343 (56.3)   |
| 10–20                                                         | 514 (33.0)  | 320 (32.3)    | 194 (33.7)   |
| >20                                                           | 190 (11.0)  | 125 (11.9)    | 65 (10.0)    |
| <b>Understanding of condition and treatment</b>               |             |               |              |
| Well informed                                                 | 295 (17.8)  | 181 (18.8)    | 114 (16.8)   |
| Inadequately/poorly informed                                  | 1114 (71.3) | 696 (70.0)    | 418 (72.6)   |
| Don't know                                                    | 177 (10.9)  | 107 (11.2)    | 70 (10.5)    |
| <b>Self-reported severity of chronic lung disease</b>         |             |               |              |
| Severe/Very severe                                            | 295 (18.7)  | 188 (19.5)    | 107 (17.9)   |
| Moderate                                                      | 578 (36.5)  | 352 (35.3)    | 226 (37.8)   |
| Mild/very mild                                                | 713 (44.8)  | 444 (45.3)    | 269 (44.4)   |
| <b>Health care professional consultations(last 12 months)</b> |             |               |              |
| No                                                            | 721 (46.8)  | 416 (42.6)    | 305 (51.3)   |
| Yes                                                           | 865 (53.2)  | 568 (57.4)    | 297 (48.7)   |
| General physician                                             | 536 (32.7)  | 347 (34.9)    | 189 (30.4)   |
| Respiratory specialist                                        | 305 (19.1)  | 193 (19.9)    | 112 (18.3)   |
| Cardiologist/heart specialist                                 | 74 (4.5)    | 45 (4.3)      | 29 (4.6)     |
| Traditional Chinese medicine doctor                           | 132 (7.7)   | 96 (9.2)      | 36 (6.1)     |
| Other medical professional                                    | 104 (6.2)   | 73 (7.0)      | 31 (5.3)     |
| <b>Hospitalisation for COPD (last 12 months)</b>              |             |               |              |
| None                                                          | 1333 (84.6) | 832 (85.1)    | 501 (84.0)   |
| One                                                           | 182 (12.0)  | 105 (11.1)    | 77 (12.9)    |
| ≥ Two                                                         | 58 (3.4)    | 37 (3.7)      | 21 (3.1)     |
| <b>Oxygen therapy at home (last 12 months)</b>                |             |               |              |
| No                                                            | 1523 (96.7) | 948 (97.3)    | 575 (96.1)   |
| Yes                                                           | 44 (3.3)    | 24 (2.7)      | 20 (3.9)     |
| <b>Vaccination (last 12 months)</b>                           |             |               |              |
| No                                                            | 1527 (96.5) | 946 (96.5)    | 581 (96.6)   |
| Yes                                                           | 59 (3.5)    | 38 (3.5)      | 21 (3.4)     |
| Influenza vaccination                                         | 54 (2.9)    | 35 (3.2)      | 19 (2.6)     |
| Pneumococcal vaccination                                      | 14 (1.0)    | 10 (0.9)      | 4 (1.1)      |
| <b>Medication for COPD exacerbation (last 12 months)</b>      |             |               |              |
| No                                                            | 1072 (68.2) | 656 (68.0)    | 416 (68.3)   |
| Yes                                                           | 514 (31.8)  | 328 (32.0)    | 186 (31.7)   |
| Antibiotics                                                   | 483 (30.2)  | 308 (30.1)    | 175 (30.2)   |
| Oral steroids                                                 | 107 (6.5)   | 64 (5.8)      | 43 (7.3)     |
| Injectable steroids                                           | 70 (4.6)    | 44 (3.8)      | 26 (5.4)     |
| Number of COPD exacerbations after medication                 |             |               |              |
| None                                                          | 1185 (74.6) | 724 (75.1)    | 461 (74.0)   |
| One                                                           | 202 (12.9)  | 134 (12.7)    | 68 (13.1)    |
| ≥ Two                                                         | 199 (12.6)  | 126 (12.2)    | 73 (12.9)    |
| <b>Prescribed medication (last 7 days)</b>                    |             |               |              |
| No                                                            | 1447 (89.4) | 903 (91.0)    | 544 (87.7)   |
| Yes                                                           | 139 (10.6)  | 81 (9.0)      | 58 (12.3)    |
| Short-acting bronchodilators                                  | 25 (2.0)    | 12 (1.3)      | 13 (2.7)     |
| Long-acting bronchodilators                                   | 16 (1.2)    | 9 (0.9)       | 7 (1.5)      |
| Oral bronchodilators                                          | 19 (1.1)    | 11 (1.1)      | 8 (1.1)      |
| Traditional Chinese medicine                                  | 33 (2.5)    | 22 (2.5)      | 11 (2.5)     |
| Other treatments                                              | 94 (7.2)    | 55 (6.2)      | 39 (8.2)     |

All the figures are standardised for region, age group and gender. Short acting bronchodilators (short-acting beta2-agonist/short-acting muscarinic antagonist); Long-acting bronchodilators (long-acting beta2-agonist / long-acting muscarinic antagonist)

**Table S4** Disease severity and management measures, by COPD sub-types (COPD LLN)

| Characteristics                                                | Study population | Symptom-based COPD % (95% CI) | Doctor-diagnosed COPD % (95% CI) | Symptom-based or doctor-diagnosed COPD % (95% CI) |
|----------------------------------------------------------------|------------------|-------------------------------|----------------------------------|---------------------------------------------------|
| <b>Participants</b>                                            | 600              | 209                           | 490                              | 600                                               |
| <b>Lung function (mean ± SD)</b>                               |                  |                               |                                  |                                                   |
| FEV1 (L)                                                       | 1.4 ± 0.1        | 1.5 ± 0.1                     | 1.3 ± 0.1                        | 1.4 ± 0.1                                         |
| FVC (L)                                                        | 2.4 ± 0.2        | 2.6 ± 0.2                     | 2.3 ± 0.2                        | 2.4 ± 0.2                                         |
| FEV1/FVC (%)                                                   | 56.4 ± 2.0       | 58.0 ± 2.0                    | 55.2 ± 2.0                       | 56.4 ± 2.0                                        |
| <b>CAT-score</b>                                               |                  |                               |                                  |                                                   |
| <10                                                            | 311              | 45.4 (43.1, 47.8)             | 50.5 (49.0, 52.1)                | 51.8 (50.5, 53.2)                                 |
| 10–20                                                          | 204              | 34.1 (31.9, 36.3)             | 34.7 (33.2, 36.2)                | 34.0 (32.7, 35.3)                                 |
| >20                                                            | 85               | 20.4 (18.5, 22.4)             | 14.8 (13.7, 15.8)                | 14.2 (13.2, 15.1)                                 |
| <b>Awareness of condition and treatment</b>                    |                  |                               |                                  |                                                   |
| Well informed                                                  | 97               | 12.7 (11.1, 14.3)             | 17.7 (16.6, 18.9)                | 16.2 (15.2, 17.2)                                 |
| Inadequately/poorly informed                                   | 438              | 74.6 (72.6, 76.7)             | 72.5 (71.2, 73.9)                | 73.0 (71.8, 74.2)                                 |
| Don't know                                                     | 65               | 12.7 (11.2, 14.2)             | 9.7 (8.8, 10.7)                  | 10.8 (10.0, 11.7)                                 |
| <b>Self-reported severity of chronic lung disease</b>          |                  |                               |                                  |                                                   |
| Severe                                                         | 150              | 26.7 (24.6, 28.8)             | 27.3 (25.9, 28.7)                | 25.0 (23.8, 26.2)                                 |
| Moderate                                                       | 229              | 36.7 (34.4, 38.9)             | 39.4 (37.9, 40.9)                | 38.2 (36.8, 39.5)                                 |
| Mild                                                           | 221              | 36.6 (34.4, 38.8)             | 33.3 (31.9, 34.7)                | 36.8 (35.5, 38.2)                                 |
| <b>Vaccination (last 12 months)</b>                            |                  |                               |                                  |                                                   |
| No                                                             | 580              | 96.9 (96.1, 97.7)             | 96.1 (95.5, 96.7)                | 96.7 (96.2, 97.2)                                 |
| Yes                                                            | 20               | 3.1 (2.3, 3.9)                | 3.9 (3.3, 4.5)                   | 3.3 (2.8, 3.8)                                    |
| Influenza vaccination                                          | 18               | 2.2 (1.5, 2.8)                | 3.7 (3.1, 4.3)                   | 3.0 (2.5, 3.5)                                    |
| Pneumococcal vaccination                                       | 3                | 1.0 (0.5, 1.4)                | 0.4 (0.2, 0.7)                   | 0.5 (0.3, 0.7)                                    |
| <b>Health care professional consultations (last 12 months)</b> |                  |                               |                                  |                                                   |
| No                                                             | 259              | 52.1 (49.8, 54.4)             | 36.1 (34.7, 37.6)                | 43.2 (41.8, 44.5)                                 |
| Yes                                                            | 341              | 47.9 (45.6, 50.2)             | 63.9 (62.4, 65.3)                | 56.8 (55.5, 58.2)                                 |
| General physician                                              | 216              | 31.5 (29.3, 33.6)             | 40.3 (38.8, 41.8)                | 36.0 (34.7, 37.3)                                 |
| Respiratory specialist                                         | 126              | 18.1 (16.3, 19.9)             | 23.7 (22.4, 24.9)                | 21.0 (19.9, 22.1)                                 |
| Cardiologist/heart specialist                                  | 33               | 3.6 (2.7, 4.6)                | 6.6 (5.9, 7.4)                   | 5.5 (4.9, 6.1)                                    |
| Traditional Chinese medicine doctor                            | 49               | 5.8 (4.7, 6.9)                | 9.6 (8.7, 10.4)                  | 8.2 (7.4, 8.9)                                    |
| Other medical professional                                     | 31               | 3.5 (2.6, 4.3)                | 5.7 (5.0, 6.5)                   | 5.2 (4.6, 5.8)                                    |
| <b>Hospitalisation for COPD (last 12 months)</b>               |                  |                               |                                  |                                                   |
| None                                                           | 481              | 84.5 (82.8, 86.3)             | 78.4 (77.1, 79.6)                | 81.3 (80.2, 82.3)                                 |
| One                                                            | 84               | 10.8 (9.3, 12.3)              | 16.4 (15.2, 17.5)                | 14.2 (13.2, 15.1)                                 |
| ≥ Two                                                          | 27               | 4.7 (3.6, 5.7)                | 5.3 (4.6, 5.9)                   | 4.6 (4.0, 5.1)                                    |
| <b>Oxygen therapy at home (last 12 months)</b>                 |                  |                               |                                  |                                                   |
| Yes                                                            | 26               | 4.0 (3.1, 4.9)                | 5.1 (4.4, 5.8)                   | 4.4 (3.8, 5.0)                                    |
| No                                                             | 563              | 96.0 (95.1, 96.9)             | 94.9 (94.2, 95.6)                | 95.6 (95.0, 96.2)                                 |
| <b>Medication for COPD exacerbation (last 12 months)</b>       |                  |                               |                                  |                                                   |
| No                                                             | 390              | 69.1 (67.0, 71.3)             | 60.8 (59.4, 62.3)                | 65.0 (63.7, 66.3)                                 |
| Yes                                                            | 210              | 30.9 (28.7, 33.0)             | 39.2 (37.7, 40.6)                | 35.0 (33.7, 36.3)                                 |
| Antibiotics                                                    | 196              | 28.5 (26.4, 30.6)             | 36.9 (35.5, 38.3)                | 32.7 (31.4, 33.9)                                 |
| Oral steroids                                                  | 56               | 8.9 (7.6, 10.2)               | 10.5 (9.6, 11.4)                 | 9.3 (8.5, 10.1)                                   |
| Injectable steroids                                            | 25               | 2.9 (2.1, 3.7)                | 4.8 (4.2, 5.5)                   | 4.2 (3.6, 4.7)                                    |
| Number of COPD exacerbations after medication                  |                  |                               |                                  |                                                   |
| None                                                           | 440              | 75.7 (73.7, 77.7)             | 69.4 (68.0, 70.7)                | 73.3 (72.1, 74.5)                                 |
| One                                                            | 68               | 6.4 (5.3, 7.6)                | 13.7 (12.6, 14.7)                | 11.3 (10.5, 12.2)                                 |
| ≥ Two                                                          | 92               | 17.9 (16.1, 19.7)             | 17.0 (15.8, 18.1)                | 15.3 (14.3, 16.3)                                 |
| <b>Prescribed medication (last 7 days)</b>                     |                  |                               |                                  |                                                   |
| No                                                             | 529              | 90.0 (88.6, 91.5)             | 86.2 (85.2, 87.3)                | 88.2 (87.3, 89.1)                                 |
| Yes                                                            | 71               | 10.0 (8.5, 11.4)              | 13.8 (12.7, 14.8)                | 11.8 (10.9, 12.7)                                 |
| Short-acting bronchodilators                                   | 13               | 2.5 (1.8, 3.2)                | 2.4 (2.0, 2.9)                   | 2.2 (1.8, 2.6)                                    |
| Long-acting bronchodilators                                    | 9                | 2.0 (1.3, 2.7)                | 1.6 (1.2, 2.0)                   | 1.5 (1.2, 1.8)                                    |
| Oral bronchodilators                                           | 10               | 1.0 (0.5, 1.5)                | 2.0 (1.6, 2.4)                   | 1.7 (1.3, 2.0)                                    |
| Any inhalers                                                   | 8                | 0.5 (0.2, 0.9)                | 1.4 (1.1, 1.8)                   | 1.3 (1.0, 1.6)                                    |
| Traditional Chinese medicine                                   | 17               | 2.0 (1.4, 2.7)                | 3.4 (2.9, 4.0)                   | 2.8 (2.4, 3.3)                                    |
| Other treatments                                               | 44               | 6.3 (5.2, 7.5)                | 8.4 (7.5, 9.2)                   | 7.3 (6.6, 8.1)                                    |

All data standardised for region, age group and gender as appropriate. Short acting bronchodilators (short-acting beta2-agonist/short-acting muscarinic antagonist); Long-acting bronchodilators (long-acting beta2-agonist / long-acting muscarinic antagonist)

**Table S5** Use of medication among COPD cases who reported taking medication in the last 7 days or in the last 12 months prior to re-survey by gender, region, socioeconomic and smoking status (COPD LLN)

| Characteristics                | Study population | Use of medication (% <b>, 95% CI</b> ) Last 7 days <sup>a</sup> | Use of medication (% <b>, 95% CI</b> ) Last 12 months <sup>b</sup> |
|--------------------------------|------------------|-----------------------------------------------------------------|--------------------------------------------------------------------|
| <b>Participants</b>            | 600              | 71                                                              | 210                                                                |
| <b>Sex</b>                     |                  |                                                                 |                                                                    |
| Men                            | 325              | 12.6 (10.9, 14.4)                                               | 34.5 (32.1, 37.0)                                                  |
| Women                          | 275              | 10.8 (9.0, 12.6)                                                | 35.6 (32.8, 38.3)                                                  |
| <b>Area</b>                    |                  |                                                                 |                                                                    |
| Rural                          | 414              | 9.9 (8.5, 11.4)                                                 | 30.6 (28.4, 32.8)                                                  |
| Urban                          | 186              | 16.2 (13.6, 18.9)                                               | 44.6 (41.0, 48.1)                                                  |
| <b>Regions<sup>c</sup></b>     |                  |                                                                 |                                                                    |
| Sichuan (R)                    | 138              | 9.5 (6.9, 12.1)                                                 | 9.4 (6.9, 12.0)                                                    |
| Gansu (R)                      | 73               | 12.5 (8.6, 16.3)                                                | 68.5 (63.2, 73.8)                                                  |
| Zhejiang (R)                   | 77               | 7.3 (4.4, 10.1)                                                 | 25.1 (20.2, 29.9)                                                  |
| Harbin (U)                     | 47               | 17.7 (12.3, 23.1)                                               | 48.8 (41.4, 56.3)                                                  |
| Henan (R)                      | 49               | 0.0 (0.0, 0.0)                                                  | 15.9 (10.4, 21.4)                                                  |
| Qingdao (U)                    | 35               | 13.6 (8.1, 19.2)                                                | 42.2 (34.7, 49.7)                                                  |
| Hunan (R)                      | 77               | 16.4 (12.1, 20.6)                                               | 47.3 (41.8, 52.8)                                                  |
| Liuzhou (U)                    | 39               | 26.7 (19.8, 33.5)                                               | 36.5 (28.8, 44.2)                                                  |
| Haikou (U)                     | 17               | 20.5 (11.8, 29.2)                                               | 57.7 (44.9, 70.4)                                                  |
| Suzhou (U)                     | 48               | 6.5 (3.0, 9.9)                                                  | 46.3 (39.3, 53.2)                                                  |
| <b>Household income (Yuan)</b> |                  |                                                                 |                                                                    |
| <10000                         | 86               | 9.3 (7.3, 11.4)                                                 | 35.4 (32.0, 38.8)                                                  |
| 10000 - 19999                  | 82               | 17.4 (14.8, 19.9)                                               | 44.2 (40.8, 47.5)                                                  |
| ≥ 20000                        | 432              | 11.4 (10.4, 12.5)                                               | 34.0 (32.5, 35.4)                                                  |
| <b>Education</b>               |                  |                                                                 |                                                                    |
| None                           | 140              | 8.5 (6.8, 10.1)                                                 | 32.6 (29.6, 35.5)                                                  |
| Primary                        | 246              | 13.2 (11.6, 14.8)                                               | 38.5 (36.5, 40.5)                                                  |
| Secondary or tertiary          | 214              | 11.8 (10.3, 13.4)                                               | 29.9 (27.7, 32.1)                                                  |
| <b>Smoking status</b>          |                  |                                                                 |                                                                    |
| Never                          | 304              | 13.1 (11.5, 14.6)                                               | 35.6 (33.5, 37.7)                                                  |
| Ex-regular                     | 92               | 14.6 (11.9, 17.2)                                               | 39.0 (35.8, 42.3)                                                  |
| Current regular                | 204              | 10.9 (9.0, 12.8)                                                | 29.9 (27.3, 32.5)                                                  |

<sup>a</sup>Medication questionnaire was completed only by those who had symptom-based COPD or history of doctor diagnosed COPD in the 2<sup>nd</sup> resurveys; Medication in last 7 days (Short-acting bronchodilators, long-acting bronchodilators, oral bronchodilators, any inhaled medications, traditional Chinese medicine and any other treatments prescribed for COPD);

<sup>b</sup>Medication in last 12 months (Antibiotics, oral corticosteroids, injectable corticosteroids). Standardised for region, age group and gender as appropriate;

<sup>c</sup>The regions are ordered by COPD prevalence as in Figure 3.

## Appendix 1: COPD questionnaire (Q7.5)

The following questions are related to your chronic lung disease. Please give the answers you feel most appropriate.

**1. Overall, how would you rate the severity of your chronic lung disease now?**

- Very severe
- Severe
- Moderate
- Mild
- Very mild

**2. How does your doctor classify the severity of your condition?**

- Stage1 (mild)
- Stage 2 (moderate)
- Stage 3 (severe)
- Stage 4 (very severe)
- Doctor has not diagnosed or told me
- Don't know

**3. The next part of the questionnaire is to measure the impact of respiratory symptoms on wellbeing and your daily life. Please indicate on a scale of 0 to 5 how strongly you feel about the two pair of the statements related to each question.**

|                                                                                                            | Score                    |                          |                          |                          |                          |                          |
|------------------------------------------------------------------------------------------------------------|--------------------------|--------------------------|--------------------------|--------------------------|--------------------------|--------------------------|
|                                                                                                            | 0                        | 1                        | 2                        | 3                        | 4                        | 5                        |
|                                                                                                            | <input type="checkbox"/> | <input type="checkbox"/> | <input type="checkbox"/> | <input type="checkbox"/> | <input type="checkbox"/> | <input type="checkbox"/> |
| <b>1) Frequency of your cough?</b><br>0= Never cough; 5= Cough all the time                                |                          |                          |                          |                          |                          |                          |
| <b>2) Amount of mucus in your chest?</b><br>0= No mucus at all; 5= Full of mucus                           |                          |                          |                          |                          |                          |                          |
| <b>3) Tightness of your chest?</b><br>0= Not tight at all; 5= Very tight                                   |                          |                          |                          |                          |                          |                          |
| <b>4) Breathless when walking up a hill/one flight of stairs?</b><br>0= Not breathless; 5= Very breathless |                          |                          |                          |                          |                          |                          |
| <b>5) Limitation of daily activities at home by the condition?</b><br>0= Not limited; 5= Very limited      |                          |                          |                          |                          |                          |                          |
| <b>6) Degree of confidence about leaving your home?</b><br>0= Confident; 5= Not confident at all           |                          |                          |                          |                          |                          |                          |
| <b>7) Quality of sleep at night and whether it is affected by the condition?</b>                           |                          |                          |                          |                          |                          |                          |



0= I sleep soundly; 5= I don't sleep soundly because of my lung condition

**8) Usual levels of energy?**

0= I have lots of energy; 5= I have no energy at all

**4. Have you ever had your lung function tested by blowing hard into a tube (excluding the present and previous CKB tests)?**

- Yes
- No
- Don't know

**5. Have you ever had your lung function tested in a cabin, called a plethysmograph?**

- Yes
- No

**6. Don't knowIn the past 12 months what types of health care professionals have you seen about your condition?**

**Yes No**

- General physician
- Respiratory specialist
- Cardiologist/heart specialist
- Traditional Chinese medicine doctor
- Local health centre or village doctor
- Other medical professional

**7. In the past 12 months, how many times have you been hospitalised overnight, or longer, as a direct result of your condition? \_\_\_\_\_ times (If none, put 0)**

**8. In the past 12 months, have you taken any of the following to treat worsening of your breathing problems?**

**Yes No**

- Antibiotics
- Oral steroids
- Injectable steroids

} → ***If ticked "NO" for all items, Go to Q9.***

**8.1 In the past 12 months, how many episodes of COPD exacerbation have you had when you took antibiotics, oral steroids, or injectable steroids to treat worsening of your breathing problems? (if none, put 0) \_\_\_\_\_ times**

**9. In the past seven days, have you taken any prescriptive medicine (such as**

**inhalers, tablets or something else) for the condition?**

- Yes → *If ticked, Go to Q9.1*
- No
- Don't know

**9.1 What types of medication have you taken in the past seven days?**

**Yes    No**

- Short-acting beta-agonists (e.g. albuterol, salbutamol)
- Short-acting anti-muscarinic agents (e.g. Atrovent, Combivent)
- Long-acting beta-agonists (salmeterol/Serevent, formoterol/Foradil)
- Long-acting anti-muscarinic agent (tiotropium/Spiriva)
- Oral bronchodilators
- Long-acting beta agonist+inhaled corticosteroid combination inhalers
- Inhaled corticosteroids
- Traditional Chinese medicine
- Other treatments

**10. In the past 12 months have you used home oxygen for your condition?**

- Yes → *If ticked, Go to Q10.1*
- No
- Don't know

**10.1 About how often do you use oxygen at home?**

- Every day
- Most days
- Once a week
- Once a month
- Only occasionally

**11. In the past 12 months, have you had an influenza vaccine (also called a flu shot)?**

- Yes
- No
- Don't know

**12. In the past 12 months, have you had a vaccine or shot which protects you against pneumonia?**

- Yes
- No
- Don't know

**13. How well informed do you feel you are about your condition and its treatment?**

- Well informed
- Less than adequately informed
- Very poorly informed
- Don't know
